# Supplementary material for: Impact of emergency care centralisation on mortality and efficiency: a retrospective service evaluation
Source: PubMed Central journal article supplement — Emerg Med J. 2020 Jan 7;37(4):180–6. doi: 10.1136/emermed-2019-208539 (PMC7146926; doi:10.1136/emermed-2019-208539), 2020-01-07
Supplement: emermed-2019-208539supp001.pdf [file emermed-2019-208539supp001.pdf]

**Supplementary material**

**Table S2:** Demographic characteristics and descriptive outcomes per age band for Baseline, ECH Year 1 and ECH Year 2.

**Table S4:** Comparison of ECH Year 2 with ECH Year 1 outcomes according to age bands

**Table S5:** Primary discharge codes and inpatient deaths for the whole cohort summarised by Clinical Classification Software in descending order of Baseline case number.

| Age in years                      | Baseline         |                  |                  |                  | ECH Year 1       |                  |                  |                  | ECH Year 2       |                  |                  |                  |
|-----------------------------------|------------------|------------------|------------------|------------------|------------------|------------------|------------------|------------------|------------------|------------------|------------------|------------------|
|                                   | All (18+)        | 18-64            | 65-79            | 80+              | All (18+)        | 18-64            | 65-79            | 80+              | All (18+)        | 18-64            | 65-79            | 80+              |
| Number of index admissions        | 18,586           | 6,951            | 5,285            | 6,350            | 16,126           | 5,758            | 4,849            | 5,519            | 17,727           | 6,198            | 5,281            | 6,248            |
| Male (%)                          | 7,856<br>(42.3%) | 2,871<br>(41.3%) | 2,581<br>(48.9%) | 2,403<br>(37.8%) | 7,060<br>(43.8%) | 2,467<br>(42.9%) | 2,470<br>(50.9%) | 2,124<br>(38.5%) | 7,690<br>(43.4%) | 2,661<br>(42.9%) | 2,582<br>(49.0%) | 2,443<br>(39.1%) |
| Age mean (SD)                     | 67.0<br>(20.2)   | 44.7<br>(13.4)   | 72.7<br>(4.3)    | 86.6<br>(4.7)    | 67.9<br>(19.3)   | 46.1<br>(13.1)   | 72.6<br>(4.3)    | 86.6<br>(4.7)    | 68.3<br>(19.1)   | 46.3<br>(12.9)   | 72.6<br>(4.3)    | 86.6<br>(4.7)    |
| CCI mean (SD)                     | 1.54<br>(2.12)   | 0.83<br>(1.56)   | 1.90<br>(2.24)   | 2.03<br>(2.32)   | 1.66<br>(2.19)   | 0.92<br>(1.67)   | 2.00<br>(2.28)   | 2.14<br>(2.37)   | 1.74<br>(2.24)   | 0.97<br>(1.75)   | 2.00<br>(2.27)   | 2.26<br>(2.43)   |
| IMDS mean (SD)                    | 24.7<br>(15.3)   | 27.6<br>(15.9)   | 23.9<br>(14.8)   | 22.2<br>(14.5)   | 24.2<br>(15.1)   | 27.1<br>(15.6)   | 23.4<br>(14.8)   | 21.8<br>(14.2)   | 24.0<br>(15.0)   | 27.0<br>(15.6)   | 23.0<br>(14.8)   | 21.9<br>(14.0)   |
| Day 60 deaths (%)                 | 1,729<br>(9.3%)  | 159<br>(2.3%)    | 511<br>(9.7%)    | 1,059<br>(16.7%) | 1,488<br>(9.2%)  | 167<br>(2.9%)    | 485<br>(10.0%)   | 836<br>(15.1%)   | 1,574<br>(8.9%)  | 173<br>(2.8%)    | 478<br>(9.1%)    | 923<br>(14.8%)   |
| Inpatient deaths (%)              | 931<br>(5.0%)    | 83<br>(1.2%)     | 235<br>(4.4%)    | 613<br>(9.7%)    | 831<br>(5.2%)    | 85<br>(1.5%)     | 256<br>(5.3%)    | 490<br>(8.9%)    | 854<br>(4.8%)    | 83<br>(1.3%)     | 252<br>(4.8%)    | 519<br>(8.3%)    |
| Outpatient deaths (%)             | 798<br>(4.3%)    | 76<br>(1.1%)     | 276<br>(5.2%)    | 446<br>(7.0%)    | 657<br>(4.1%)    | 82<br>(1.4%)     | 229<br>(4.7%)    | 346<br>(6.3%)    | 720<br>(4.1%)    | 90<br>(1.5%)     | 226<br>(4.3%)    | 404<br>(6.5%)    |
| Inpatient days median (IQR)       | 1 (0-6)          | 0 (0-2)          | 2 (0-7)          | 4 (1-12)         | 1 (0-6)          | 1 (0-2)          | 2 (0-7)          | 4 (1-14)         | 1 (0-6)          | 1 (0-2)          | 2 (0-6)          | 3 (1-12)         |
| Inpatient days mean (SD)          | 6.2<br>(13.8)    | 2.4<br>(6.7)     | 6.4<br>(13.4)    | 10.3<br>(18.1)   | 6.8<br>(15.5)    | 2.4<br>(6.9)     | 6.9<br>(17.2)    | 11.3<br>(18.7)   | 5.8<br>(12.3)    | 2.3<br>(6.5)     | 5.7<br>(11.6)    | 9.5<br>(15.8)    |
| Readmissions (% discharged alive) | 3,752<br>(21.3%) | 1,108<br>(16.1%) | 1,186<br>(23.5%) | 1,458<br>(25.4%) | 3,001<br>(19.6%) | 796<br>(14.0%)   | 997<br>(21.7%)   | 1,208<br>(24.0%) | 3,177<br>(18.8%) | 815<br>(13.3%)   | 988<br>(19.7%)   | 1,374<br>(24.0%) |

CCI: Charlson Comorbidity Index; IMDS: Index of Multiple Deprivation Score

**Table S2:** Demographic characteristics and descriptive outcomes per age band for Baseline, ECH Year 1 and ECH Year 2.

|                                               | All (18+ years)                  | Age 18-64 years                  | Age 65-79 years                  | Age 80+ years                    |
|-----------------------------------------------|----------------------------------|----------------------------------|----------------------------------|----------------------------------|
| All Day 60 mortality                          | 0.93<br>(0.85 to 1.00)<br>p=0.05 | 0.93<br>(0.75 to 1.16)<br>p=0.53 | 0.89<br>(0.78 to 1.03)<br>p=0.11 | 0.94<br>(0.85 to 1.05)<br>p=0.28 |
| Inpatient Day 60 mortality                    | 0.89<br>(0.81 to 0.99)<br>p=0.04 | 0.88<br>(0.65 to 1.20)<br>p=0.42 | 0.90<br>(0.75 to 1.08)<br>p=0.26 | 0.90<br>(0.79 to 1.03)<br>p=0.12 |
| Post-discharge Day 60 mortality               | 0.96<br>(0.86 to 1.07)<br>p=0.46 | 0.98<br>(0.72 to 1.33)<br>p=0.89 | 0.89<br>(0.74 to 1.08)<br>p=0.23 | 0.99<br>(0.86 to 1.16)<br>p=0.99 |
| Probability of discharge per day up to Day 60 | 1.03<br>(1.01 to 1.05)<br>p=0.01 | 0.99<br>(0.96 to 1.03)<br>p=0.36 | 1.01<br>(0.96 to 1.05)<br>p=0.32 | 1.08<br>(1.04 to 1.13)<br>p<0.01 |
| Readmission <60 days of discharge             | 0.93<br>(0.89 to 0.99)<br>p=0.01 | 0.94<br>(0.86 to 1.03)<br>p=0.18 | 0.89<br>(0.82 to 0.97)<br>p<0.01 | 0.98<br>(0.92 to 1.05)<br>p=0.65 |
| ED re-attendance <60 days of discharge        | 0.72<br>(0.67 to 0.78)<br>p<0.01 | 0.79<br>(0.72 to 0.88)<br>p<0.01 | 0.73<br>(0.62 to 0.85)<br>p<0.01 | 0.59<br>(0.51 to 0.69)<br>p<0.01 |

Outcomes are odds ratios (95% CI) for ECH Year 2 relative to ECH Year 1

**Table S4:** Comparison of ECH Year 2 with ECH Year 1 outcomes according to age bands

| Clinical Classification Software Code                           | Baseline    |                           | ECH Year 1  |                           | ECH Year 2  |                           |
|-----------------------------------------------------------------|-------------|---------------------------|-------------|---------------------------|-------------|---------------------------|
|                                                                 | Index cases | Inpatient deaths <60 days | Index cases | Inpatient deaths <60 days | Index cases | Inpatient deaths <60 days |
| Pneumonia (except caused by TB or STI)                          | 1,058       | 228                       | 894         | 156                       | 1,167       | 190                       |
| Nonspecific chest pain                                          | 1,040       | 1                         | 856         | 0                         | 975         | 0                         |
| Urinary tract infections                                        | 831         | 22                        | 674         | 23                        | 630         | 19                        |
| Chronic obstructive pulmonary disease & bronchiectasis          | 819         | 32                        | 705         | 19                        | 677         | 21                        |
| Other connective tissue disease                                 | 731         | 8                         | 781         | 11                        | 838         | 9                         |
| Abdominal pain                                                  | 671         | 1                         | 428         | 4                         | 432         | 0                         |
| Cardiac dysrhythmias                                            | 418         | 4                         | 396         | 9                         | 404         | 4                         |
| Acute cerebrovascular disease                                   | 410         | 68                        | 384         | 55                        | 408         | 76                        |
| Acute bronchitis                                                | 409         | 14                        | 244         | 11                        | 316         | 6                         |
| Coronary atherosclerosis & other heart disease                  | 384         | 3                         | 347         | 0                         | 336         | 2                         |
| Intestinal infection                                            | 350         | 7                         | 292         | 6                         | 325         | 5                         |
| Congestive heart failure, non-hypertensive                      | 337         | 57                        | 308         | 48                        | 326         | 34                        |
| Spondylosis, intervertebral disc disorders; other back problems | 335         | 1                         | 292         | 4                         | 306         | 3                         |
| Other gastrointestinal disorders                                | 329         | 10                        | 165         | 4                         | 214         | 7                         |
| Superficial injury, contusion                                   | 328         | 1                         | 237         | 2                         | 281         | 2                         |
| Skin & subcutaneous tissue infections                           | 325         | 4                         | 326         | 3                         | 424         | 4                         |
| Biliary tract disease                                           | 267         | 5                         | 262         | 13                        | 254         | 9                         |
| Headache, including migraine                                    | 267         | 0                         | 273         | 0                         | 298         | 0                         |
| Syncope                                                         | 265         | 0                         | 223         | 1                         | 250         | 0                         |
| Fracture of neck of femur (hip)                                 | 259         | 21                        | 291         | 26                        | 317         | 21                        |
| Other non-traumatic joint disorders                             | 257         | 4                         | 135         | 0                         | 170         | 1                         |
| Epilepsy, convulsions                                           | 225         | 3                         | 161         | 1                         | 183         | 2                         |
| Senility & organic mental disorders                             | 223         | 15                        | 179         | 9                         | 154         | 11                        |

|                                                     |     |    |     |    |     |    |
|-----------------------------------------------------|-----|----|-----|----|-----|----|
| Septicaemia (except in labour)                      | 217 | 43 | 231 | 45 | 372 | 66 |
| Poisoning by psychotropic agents                    | 210 | 1  | 191 | 0  | 210 | 0  |
| Poisoning by other medications & drugs              | 207 | 1  | 174 | 1  | 207 | 1  |
| Acute myocardial infarction                         | 205 | 19 | 190 | 10 | 261 | 23 |
| Asthma                                              | 203 | 1  | 167 | 0  | 177 | 2  |
| Gastrointestinal haemorrhage                        | 202 | 12 | 135 | 8  | 146 | 7  |
| Alcohol-related mental disorders                    | 193 | 0  | 160 | 0  | 163 | 1  |
| Fracture of upper limb                              | 192 | 3  | 131 | 10 | 139 | 2  |
| Acute & unspecified renal failure                   | 191 | 22 | 222 | 32 | 202 | 29 |
| Open wounds of head, neck, & trunk                  | 185 | 0  | 136 | 0  | 174 | 0  |
| Other CNS infection & poliomyelitis                 | 177 | 0  | 141 | 1  | 139 | 1  |
| Deficiency and other anaemia                        | 169 | 2  | 133 | 1  | 117 | 1  |
| Other fractures                                     | 167 | 6  | 183 | 13 | 217 | 6  |
| Fracture of lower limb                              | 150 | 5  | 116 | 8  | 113 | 4  |
| Other upper respiratory disease                     | 145 | 0  | 98  | 0  | 151 | 0  |
| Other nervous system disorders                      | 141 | 1  | 135 | 0  | 190 | 5  |
| Conditions associated with dizziness                | 137 | 0  | 97  | 0  | 108 | 0  |
| Complication of device, implant or                  | 134 | 2  | 124 | 1  | 150 | 3  |
| Fluid & electrolyte disorders                       | 130 | 5  | 163 | 5  | 128 | 1  |
| Pancreatic disorders (not diabetes)                 | 124 | 3  | 127 | 6  | 127 | 0  |
| Transient cerebral ischemia                         | 120 | 1  | 119 | 0  | 128 | 0  |
| Diverticulosis & diverticulitis                     | 111 | 2  | 91  | 6  | 139 | 3  |
| Residual codes, unclassified                        | 111 | 0  | 102 | 1  | 143 | 0  |
| Complication of surgical procedures or medical care | 109 | 1  | 100 | 0  | 94  | 1  |
| Other endocrine disorders                           | 105 | 1  | 100 | 4  | 69  | 1  |
| Aspiration pneumonitis, food/vomitus                | 102 | 47 | 101 | 24 | 90  | 26 |
| Calculus of urinary tract                           | 99  | 0  | 56  | 0  | 77  | 0  |
| Cancer of bronchus, lung                            | 98  | 38 | 89  | 28 | 90  | 27 |
| Intestinal obstruction without hernia               | 95  | 8  | 104 | 6  | 123 | 5  |

|                                                 |    |    |     |    |     |    |
|-------------------------------------------------|----|----|-----|----|-----|----|
| Crushing injury or internal injury              | 94 | 2  | 68  | 4  | 77  | 1  |
| Oesophageal disorders                           | 94 | 3  | 121 | 3  | 121 | 0  |
| Diabetes mellitus with complication             | 91 | 2  | 104 | 1  | 113 | 6  |
| Genitourinary symptoms & ill-defined conditions | 91 | 1  | 61  | 0  | 86  | 1  |
| Gastritis & duodenitis                          | 89 | 0  | 73  | 0  | 56  | 0  |
| Other lower respiratory disease                 | 88 | 9  | 60  | 8  | 69  | 2  |
| Phlebitis, thrombophlebitis & thromboembolism   | 88 | 0  | 153 | 1  | 133 | 1  |
| Abdominal hernia                                | 86 | 3  | 63  | 1  | 77  | 5  |
| Other complications of pregnancy                | 83 | 0  | 53  | 0  | 48  | 0  |
| Pulmonary heart disease                         | 76 | 4  | 88  | 5  | 97  | 2  |
| Pleurisy, pneumothorax, pulmonary collapse      | 71 | 2  | 87  | 1  | 67  | 1  |
| Viral infection                                 | 69 | 0  | 65  | 0  | 87  | 0  |
| Regional enteritis & ulcerative colitis         | 63 | 0  | 47  | 1  | 46  | 1  |
| Gout and other crystal arthropathies            | 62 | 1  | 41  | 1  | 55  | 0  |
| Other psychoses                                 | 61 | 0  | 56  | 0  | 52  | 1  |
| Liver disease, alcohol-related                  | 60 | 12 | 68  | 15 | 62  | 16 |
| Diabetes mellitus without complications         | 59 | 0  | 52  | 0  | 37  | 0  |
| Menstrual disorders                             | 59 | 0  | 16  | 0  | 31  | 0  |
| Open wounds of extremities                      | 59 | 0  | 52  | 1  | 58  | 1  |
| Nausea & vomiting                               | 57 | 0  | 53  | 0  | 62  | 0  |
| Nephritis, nephrosis, renal sclerosis           | 57 | 0  | 52  | 0  | 64  | 0  |
| Anxiety, somatoform, dissociative,              | 53 | 0  | 33  | 0  | 38  | 0  |
| Pathological fracture                           | 50 | 2  | 37  | 3  | 60  | 2  |
| Appendicitis & other appendiceal conditions     | 49 | 0  | 62  | 0  | 45  | 0  |
| Other upper respiratory infections              | 49 | 0  | 33  | 0  | 52  | 0  |
| Missing                                         | 47 | 1  | 50  | 3  | 82  | 0  |
| Other liver diseases                            | 47 | 3  | 27  | 2  | 42  | 4  |
| Other skin disorders                            | 47 | 0  | 42  | 0  | 34  | 0  |
| Affective disorders                             | 45 | 0  | 24  | 0  | 23  | 0  |

|                                                           |    |    |    |    |    |    |
|-----------------------------------------------------------|----|----|----|----|----|----|
| Other injuries & conditions due to external causes        | 43 | 0  | 38 | 2  | 40 | 2  |
| Parkinson's disease                                       | 42 | 1  | 30 | 0  | 33 | 2  |
| Allergic reactions                                        | 41 | 0  | 33 | 0  | 32 | 0  |
| Cancer of colon                                           | 40 | 10 | 23 | 8  | 36 | 8  |
| Secondary malignancies                                    | 38 | 5  | 51 | 11 | 66 | 7  |
| Anal & rectal conditions                                  | 36 | 1  | 39 | 0  | 33 | 1  |
| Conduction disorders                                      | 36 | 1  | 47 | 0  | 50 | 2  |
| Malaise & fatigue                                         | 35 | 2  | 30 | 1  | 34 | 1  |
| Other diseases of kidneys & ureters                       | 33 | 0  | 36 | 0  | 52 | 0  |
| Intracranial injury                                       | 32 | 5  | 45 | 4  | 61 | 3  |
| Other bone disease & musculoskeletal deformities          | 32 | 0  | 29 | 1  | 27 | 0  |
| Peripheral & visceral atherosclerosis                     | 31 | 14 | 24 | 12 | 38 | 11 |
| Other hereditary & degenerative nervous system conditions | 30 | 1  | 20 | 1  | 24 | 2  |
| Spontaneous abortion                                      | 30 | 0  | 15 | 0  | 16 | 0  |
| Haemorrhage during pregnancy, abrupt                      | 29 | 0  | 14 | 0  | 13 | 0  |
| Other nutritional, endocrine & metabolic                  | 29 | 1  | 46 | 4  | 41 | 1  |
| Respiratory failure, insufficiency, arrest                | 29 | 7  | 31 | 3  | 29 | 4  |
| Other disorders of stomach & duodenum                     | 28 | 0  | 25 | 0  | 25 | 0  |
| Blindness & vision defects                                | 27 | 0  | 24 | 0  | 13 | 0  |
| Cancer of stomach                                         | 26 | 8  | 13 | 6  | 13 | 2  |
| Skull & face fractures                                    | 26 | 1  | 24 | 0  | 21 | 1  |
| Essential hypertension                                    | 25 | 0  | 22 | 0  | 29 | 0  |
| Haemorrhoids                                              | 24 | 0  | 4  | 0  | 0  | 0  |
| Joint disorders & dislocations, trauma-related            | 24 | 0  | 19 | 0  | 22 | 0  |
| Cancer of pancreas                                        | 22 | 7  | 25 | 5  | 21 | 8  |
| Coma, stupor & brain damage                               | 22 | 2  | 13 | 3  | 25 | 4  |
| Ovarian cyst                                              | 22 | 0  | 28 | 0  | 21 | 0  |
| Poisoning by nonmedicinal substances                      | 22 | 0  | 3  | 0  | 8  | 0  |
| Cancer of breast                                          | 21 | 4  | 23 | 3  | 19 | 6  |

|                                                                |    |   |    |    |    |   |
|----------------------------------------------------------------|----|---|----|----|----|---|
| Cancer of oesophagus                                           | 20 | 8 | 17 | 5  | 29 | 5 |
| Cancer of prostate                                             | 20 | 5 | 20 | 10 | 17 | 4 |
| Inflammatory diseases of female pelvic organs                  | 20 | 0 | 10 | 0  | 19 | 0 |
| Leukaemia                                                      | 20 | 4 | 18 | 4  | 22 | 9 |
| Chronic ulcer of skin                                          | 19 | 0 | 40 | 0  | 20 | 1 |
| Heart valve disorders                                          | 19 | 2 | 33 | 2  | 19 | 4 |
| Cancer of rectum and anus                                      | 18 | 5 | 20 | 6  | 18 | 5 |
| Non-infectious gastroenteritis                                 | 18 | 0 | 10 | 1  | 21 | 0 |
| Other inflammatory conditions of skin                          | 18 | 2 | 9  | 0  | 13 | 0 |
| Peri-, endo-, & myocarditis, cardiomyopathy (except TB or STI) | 18 | 2 | 23 | 1  | 16 | 0 |
| Induced abortion                                               | 17 | 0 | 14 | 0  | 12 | 0 |
| Influenza                                                      | 16 | 2 | 36 | 2  | 59 | 3 |
| Infective arthritis & osteomyelitis                            | 15 | 1 | 18 | 0  | 29 | 1 |
| Fever of unknown origin                                        | 14 | 0 | 16 | 1  | 27 | 0 |
| Hyperplasia of prostate                                        | 14 | 0 | 12 | 0  | 9  | 0 |
| Other mental conditions                                        | 14 | 0 | 13 | 0  | 12 | 0 |
| Aortic, peripheral & visceral arteries                         | 13 | 3 | 8  | 1  | 11 | 3 |
| Gastroduodenal ulcer (except haemorrhage)                      | 13 | 1 | 17 | 2  | 17 | 2 |
| Malignant neoplasm without specification of site               | 13 | 4 | 21 | 8  | 12 | 6 |
| Multiple sclerosis                                             | 12 | 1 | 8  | 0  | 6  | 0 |
| Non-malignant breast conditions                                | 12 | 0 | 5  | 0  | 5  | 0 |
| Other screening for suspected conditions                       | 12 | 0 | 13 | 0  | 12 | 0 |
| Rheumatoid arthritis & related disease                         | 12 | 1 | 8  | 0  | 4  | 0 |
| Acute & chronic tonsillitis                                    | 11 | 0 | 9  | 0  | 15 | 0 |
| Cancer of brain & nervous system                               | 11 | 1 | 13 | 4  | 16 | 2 |
| Cardiac arrest & ventricular fibrillation                      | 11 | 6 | 11 | 6  | 12 | 7 |
| Chronic renal failure                                          | 11 | 0 | 7  | 1  | 7  | 2 |
| Coagulation & haemorrhagic disorders                           | 11 | 0 | 12 | 0  | 10 | 0 |
| Inflammatory conditions of male genital organs                 | 11 | 0 | 7  | 0  | 11 | 0 |



|                                                           |    |   |    |   |    |   |
|-----------------------------------------------------------|----|---|----|---|----|---|
| Multiple myeloma                                          | 11 | 3 | 11 | 5 | 14 | 4 |
| Mycoses                                                   | 11 | 0 | 8  | 0 | 7  | 0 |
| Non-Hodgkin's lymphoma                                    | 11 | 1 | 12 | 4 | 12 | 2 |
| Other male genital disorders                              | 11 | 0 | 7  | 0 | 7  | 0 |
| Cancer of liver & intrahepatic bile                       | 10 | 3 | 16 | 3 | 11 | 3 |
| Ectopic pregnancy                                         | 10 | 0 | 8  | 0 | 11 | 0 |
| Other & unspecified benign neoplasm                       | 10 | 0 | 12 | 1 | 5  | 1 |
| Substance-related mental disorders                        | 10 | 0 | 12 | 0 | 10 | 0 |
| Diseases of mouth, excluding dental                       | 9  | 0 | 9  | 0 | 12 | 1 |
| Disorders of teeth & jaw                                  | 9  | 0 | 8  | 0 | 6  | 0 |
| Neoplasms of unspecified nature or uncertain behaviour    | 9  | 0 | 9  | 0 | 12 | 3 |
| Rehabilitation care, fitting of prostheses                | 9  | 0 | 2  | 0 | 5  | 0 |
| Sprains & strains                                         | 9  | 0 | 11 | 0 | 6  | 0 |
| Lung disease due to external agents                       | 8  | 0 | 5  | 1 | 7  | 1 |
| Meningitis (except that caused by TB or STI)              | 8  | 0 | 12 | 0 | 4  | 0 |
| Osteoarthritis                                            | 8  | 1 | 9  | 0 | 7  | 0 |
| Other & ill-defined cerebrovascular                       | 8  | 0 | 5  | 1 | 1  | 0 |
| Other complications of birth, puerperium affecting mother | 8  | 0 | 6  | 0 | 2  | 0 |
| Other female genital disorders                            | 8  | 0 | 8  | 0 | 4  | 0 |
| Burns                                                     | 7  | 0 | 5  | 1 | 2  | 0 |
| Cancer, other & unspecified primary                       | 7  | 5 | 7  | 2 | 4  | 1 |
| Cancer, other respiratory & intrathoracic                 | 7  | 4 | 9  | 5 | 8  | 2 |
| Other disease of veins & lymphatics                       | 7  | 0 | 22 | 0 | 23 | 0 |
| Paralysis                                                 | 7  | 0 | 11 | 0 | 16 | 0 |
| Bacterial infection, unspecified site                     | 6  | 1 | 7  | 2 | 12 | 2 |
| Diseases of white blood cells                             | 6  | 0 | 5  | 0 | 5  | 1 |
| Menopausal disorders                                      | 6  | 0 | 2  | 0 | 1  | 0 |
| Otitis media & related conditions                         | 6  | 0 | 2  | 0 | 4  | 0 |
| Varicose veins of lower extremity                         | 6  | 0 | 11 | 0 | 17 | 0 |

|                                                            |   |   |    |   |    |   |
|------------------------------------------------------------|---|---|----|---|----|---|
| Cancer of head & neck                                      | 5 | 2 | 3  | 2 | 4  | 2 |
| Cancer of ovary                                            | 5 | 0 | 5  | 0 | 10 | 4 |
| Encephalitis (except that caused by TB or STI)             | 5 | 0 | 3  | 1 | 2  | 1 |
| Endometriosis                                              | 5 | 0 | 3  | 0 | 1  | 0 |
| Other diseases of bladder & urethra                        | 5 | 0 | 2  | 0 | 4  | 0 |
| Other ear & sense organ disorders                          | 5 | 0 | 3  | 0 | 6  | 0 |
| Other eye disorders                                        | 5 | 0 | 10 | 0 | 6  | 0 |
| Other infections, including parasitic                      | 5 | 0 | 3  | 0 | 6  | 0 |
| Peritonitis & intestinal abscess                           | 5 | 0 | 1  | 1 | 14 | 1 |
| Cancer of bladder                                          | 4 | 1 | 5  | 0 | 7  | 3 |
| Cancer of other female genital organs                      | 4 | 1 | 12 | 0 | 10 | 1 |
| Open wounds of head, neck & trunk                          | 4 | 0 | 2  | 1 | 9  | 1 |
| Shock                                                      | 4 | 2 | 1  | 0 | 2  | 2 |
| Aortic & peripheral arterial emboli                        | 3 | 1 | 6  | 1 | 1  | 0 |
| Benign neoplasm of uterus                                  | 3 | 0 | 1  | 0 | 4  | 0 |
| Cancer of kidney & renal pelvis                            | 3 | 3 | 9  | 1 | 7  | 2 |
| Digestive congenital anomalies                             | 3 | 0 | 4  | 0 | 1  | 0 |
| Medical examination/evaluation                             | 3 | 0 | 1  | 0 | 1  | 0 |
| Other aftercare                                            | 3 | 0 | 4  | 0 | 4  | 0 |
| Prolapse of female genital organs                          | 3 | 0 | 1  | 0 | 1  | 0 |
| Schizophrenia & related disorders                          | 3 | 0 | 4  | 0 | 6  | 0 |
| Systemic lupus erythematosus & connective tissue disorders | 3 | 0 | 3  | 0 | 0  | 0 |
| Thyroid disorders                                          | 3 | 0 | 6  | 0 | 2  | 0 |
| Cancer of bone & connective tissue                         | 2 | 0 | 2  | 2 | 2  | 1 |
| Cancer of uterus                                           | 2 | 0 | 2  | 0 | 1  | 1 |
| Hepatitis                                                  | 2 | 0 | 2  | 0 | 0  | 0 |
| Hypertension with complications & secondary hypertension   | 2 | 0 | 5  | 1 | 2  | 0 |
| Immunity disorders                                         | 2 | 0 | 1  | 0 | 0  | 0 |
| Nutritional deficiencies                                   | 2 | 0 | 1  | 0 | 4  | 0 |

|                                                      |   |   |   |   |   |   |
|------------------------------------------------------|---|---|---|---|---|---|
| Osteoporosis                                         | 2 | 0 | 1 | 0 | 2 | 0 |
| Other hematologic conditions                         | 2 | 0 | 2 | 0 | 2 | 0 |
| Retinal detachments, defects, vascular occlusion     | 2 | 0 | 2 | 0 | 7 | 0 |
| Acquired foot deformities                            | 1 | 0 | 0 | 0 | 0 | 0 |
| Acute post-haemorrhagic anaemia                      | 1 | 0 | 0 | 0 | 0 | 0 |
| Cancer of cervix                                     | 1 | 0 | 1 | 0 | 1 | 0 |
| Cancer of other GI organs, peritoneum                | 1 | 1 | 0 | 2 | 1 | 3 |
| Contraceptive & procreative management               | 1 | 0 | 0 | 0 | 0 | 0 |
| Disorders of lipid metabolism                        | 1 | 0 | 1 | 0 | 0 | 0 |
| Hodgkin's disease                                    | 1 | 1 | 1 | 0 | 2 | 1 |
| Inflammation, infection of eye (except TB or STI)    | 1 | 0 | 3 | 2 | 9 | 0 |
| Lymphadenitis                                        | 1 | 0 | 0 | 0 | 4 | 0 |
| Melanomas of skin                                    | 1 | 0 | 3 | 0 | 0 | 0 |
| Other acquired deformities                           | 1 | 0 | 1 | 0 | 2 | 0 |
| Other non-epithelial cancer of skin                  | 1 | 1 | 1 | 0 | 0 | 0 |
| Post-abortion complications                          | 1 | 0 | 0 | 0 | 0 | 0 |
| Preadult disorders                                   | 1 | 0 | 0 | 0 | 0 | 0 |
| Sexually transmitted diseases (not HIV or hepatitis) | 1 | 0 | 1 | 0 | 1 | 0 |
| Tuberculosis                                         | 1 | 0 | 2 | 1 | 0 | 0 |
| Cancer of other urinary organs                       | 0 | 0 | 1 | 0 | 1 | 1 |
| Cancer of thyroid                                    | 0 | 0 | 1 | 1 | 0 | 0 |
| Cardiac & circulatory congenital anomalies           | 0 | 0 | 1 | 0 | 1 | 0 |
| Cystic fibrosis                                      | 0 | 0 | 0 | 0 | 1 | 0 |
| Gangrene                                             | 0 | 0 | 1 | 0 | 3 | 0 |
| Genitourinary congenital anomalies                   | 0 | 0 | 0 | 0 | 1 | 0 |
| Glaucoma                                             | 0 | 0 | 0 | 0 | 2 | 0 |
| Nervous system congenital anomalies                  | 0 | 0 | 0 | 0 | 1 | 0 |
| Normal pregnancy and/or delivery                     | 0 | 0 | 1 | 0 | 1 | 0 |
| Occlusion or stenosis of precerebral arteries        | 0 | 0 | 1 | 0 | 2 | 0 |

|                                     |        |     |        |     |        |     |
|-------------------------------------|--------|-----|--------|-----|--------|-----|
| Other & ill-defined heart disease   | 0      | 0   | 4      | 0   | 1      | 0   |
| Other circulatory disease           | 0      | 4   | 4      | 7   | 3      | 5   |
| Other congenital anomalies          | 0      | 0   | 1      | 0   | 0      | 0   |
| Personal history of mental disorder | 0      | 0   | 3      | 0   | 2      | 0   |
| Spinal cord injury                  | 0      | 0   | 1      | 0   | 0      | 0   |
| Total                               | 18,586 | 931 | 16,126 | 831 | 17,727 | 854 |

**Table S5:** Primary discharge codes and inpatient deaths for the whole cohort summarised by Clinical Classification Software in descending order of Baseline case number.
